# Supplementary material for: New metal complexes with di(mono)acylhydrazidate molecules
Source: Royal Society of Chemistry journal article supplement (doi:10.1039/c2dt30941f), 2012-01-01
Supplement: c2dt30941f.pdf [file c2dt30941f.pdf]

# Supporting materials

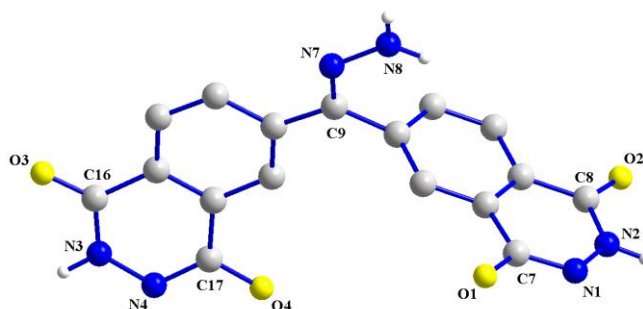

Scheme S1 The structure of DPHKH in compound 1.

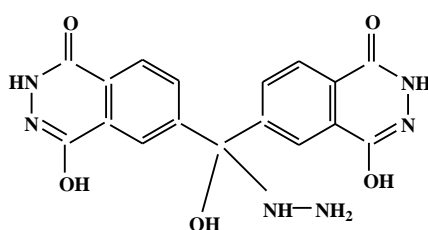

Scheme S2 The structure of the intermediate in compound 1.

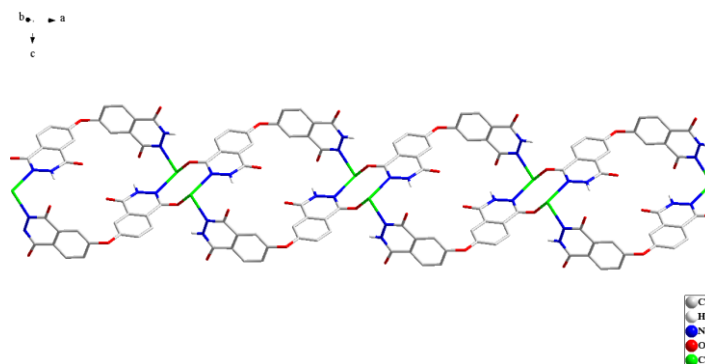

Fig. S1 The 1-D chain structure of compound 2 based on two types of loops (phen is omitted for clarity).

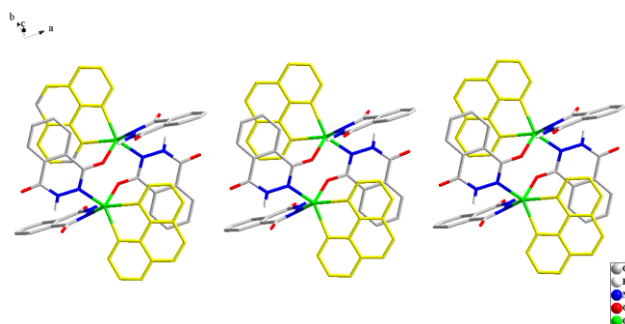

Fig. S2 The dinuclear structure slice of compound 2 (O5 is omitted).

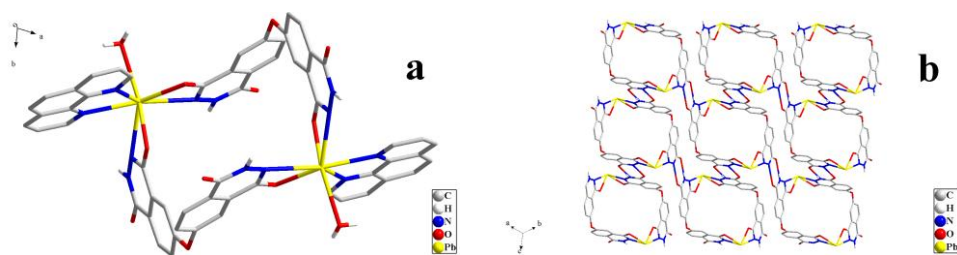

Fig. S3 The molecular unit (a) and 2-D supramolecular layer (b) of  $[Pb_2(ODPTH)_2(phen)_2(H_2O)_2]_2$  for comparison.

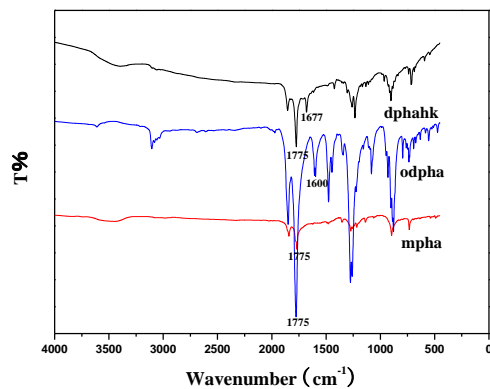

Fig. S4. The IR spectra of the used organic polycarboxylic acids.

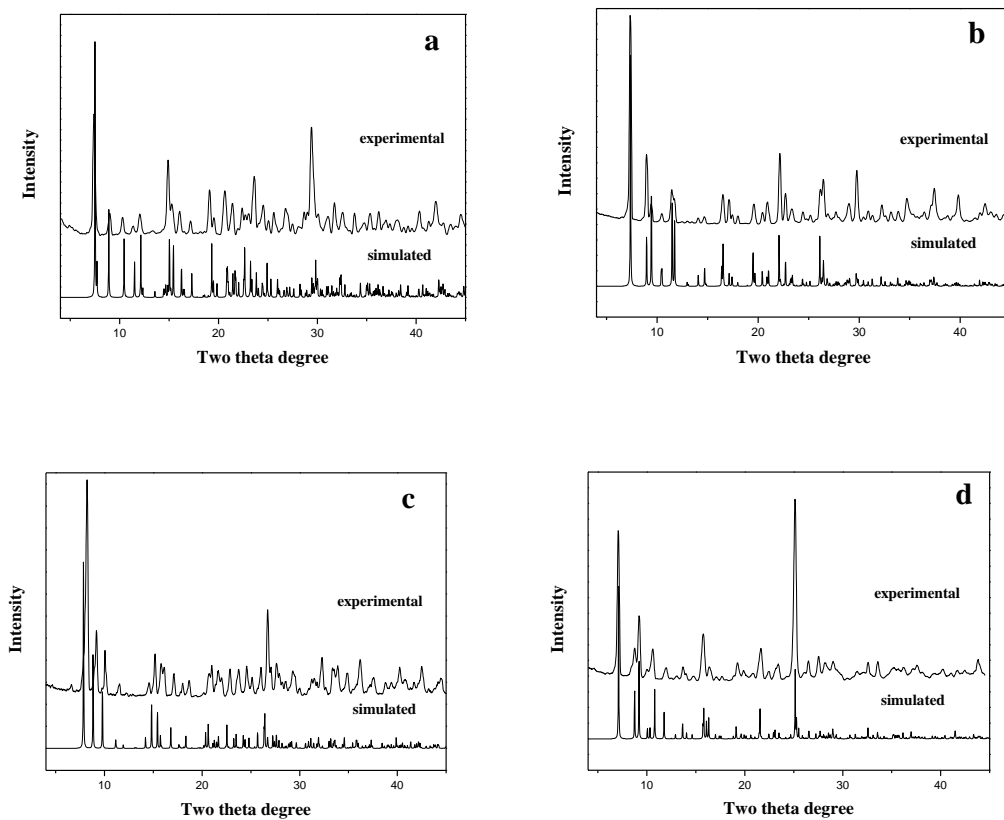

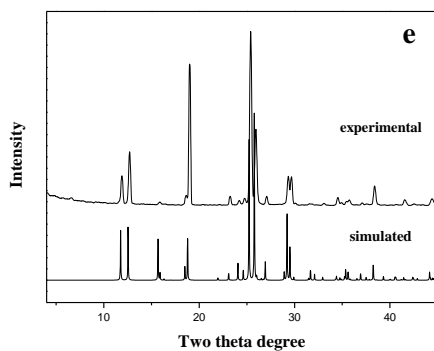

Fig. S5. The experimental and simulated XRD patterns for compounds 1 (a), 2 (b), 3 (c), 4 (d) and 5 (e).

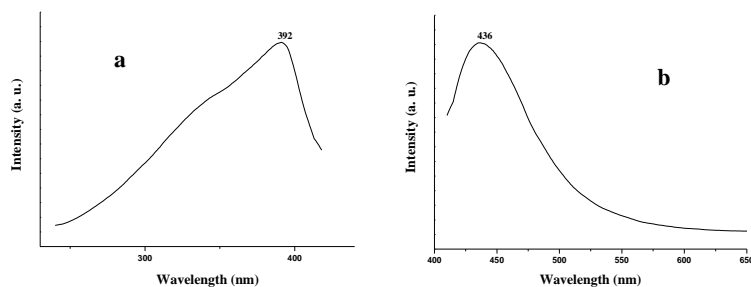

Fig. S6 The solid-state excitation (a) and emission spectra (b) of the organic APTH molecule.
